# Supplementary material for: Changing Minds on MOUD: Impact of Messages to Motivate Expanded Access to Buprenorphine in Primary Care Settings
Source: Research Square preprint supplement (doi:10.21203/rs.3.rs-8769235/v1), 2026-02-16
Supplement: Supplementary file 1 [file 5251848dcf427e6f0f43aa3e.docx]

**APPENDICES: Additional (Supplementary) Files**

1: **Supplementary Figure AF1.** Research Survey Question Format

2: **Supplementary Table AT1**. Change Ratings for Importance of Barriers to Buprenorphine Prescribing: Post / Retrospective-Pre

3: **Supplementary Table AT2.** Change Ratings for Confidence and Likelihood of Offering Opioid Use Disorder Treatment: Post / Retrospective-Pre

**AF1. Research Survey Question Format**

Please read each of the statements in the center section.

Then please select a response under BOTH the left and right columns on each line. Make sure you have two responses for each statement.


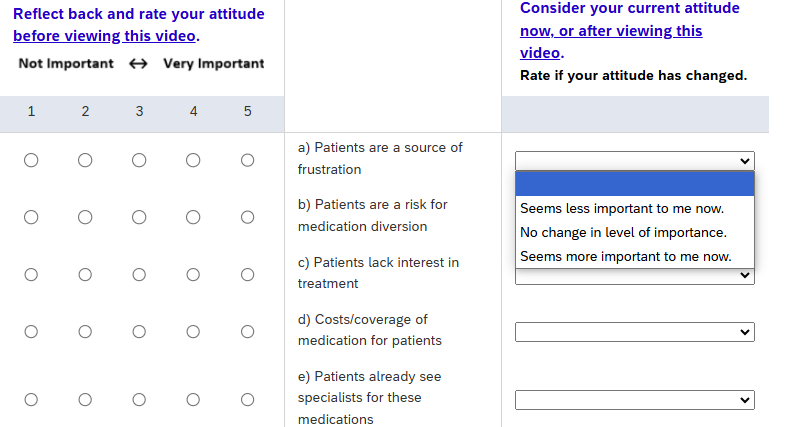
This first set regards Barriers related to patients with opioid use disorder:
**How important do you feel each of the following is as a potential barrier to your use of buprenorphine, specifically, as a medication for opioid use disorder (MOUD) in your clinic?**

Note: Statements (middle column above) are those shown in Figure 1 (only items with statistically significant different rating changes) and Table 3 (all items).

**Now we will cover activities related to the prescribing of buprenorphine, specifically, as a medication for opioid use disorder (MOUD) in your clinic.**This set asks: How confident are you in each of the following aspects of your patient care?


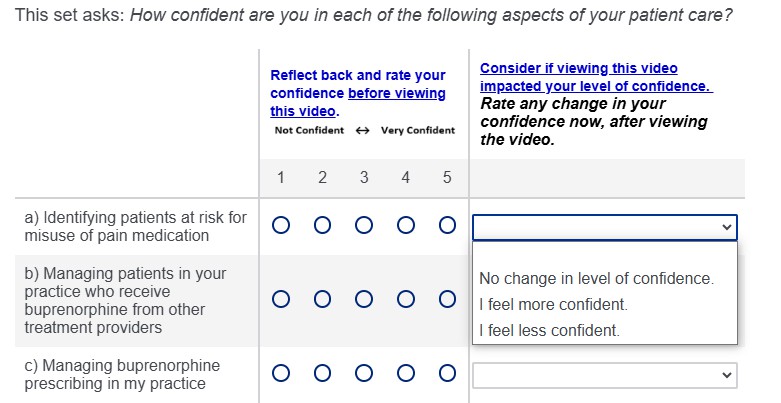


Note: Question Sets shown in Table 3 (bottom: Confidence, Likelihood to Engage in Treatment) were formatted as above. Figure 2 depicts one significant item.

**AT1. Change Ratings for Importance of Barriers to Buprenorphine Prescribing: Post / retrospective-Pre (N=37*)**

|  | Pre-Video Rating† | Post-Video Change (Frequency): | | | | |
| --- | --- | --- | --- | --- | --- | --- |
| Less Important | No Change | More Important | No Rating | p-value |
| **Barriers related to Patients with OUD** | | | | | | |
| a) Patients are a Source of Frustration | 1  2  3  4  5  Missing  Total | 0 (0%)  4 (11%)  5 (14%)  6 (16%)  5 (14%)  0 (0%)  20 (54%) | 2 (5.4%)  4 (11%)  3 (8.1%)  1 (2.7%)  1 (2.7%)  1 (2.7%)  12 (32%) | 0 (0%)  0 (0%)  3 (8.1%)  0 (0%)  1 (2.7%)  0 (0%)  4 (11%) | 0 (0%)  0 (0%)  1 (2.7%)  0 (0%)  0 (0%)  0 (0%)  1 (2.7%) | 0.20 |
| b) Patients are a risk for medication diversion | 1  2  3  4  5  Missing  Total | 0 (0%)  2 (5.4%)  0 (0%)  6 (16%)  8 (22%)  0 (0%)  16 (43%) | 1 (2.7%)  2 (5.4%)  5 (14%)  4 (11%)  2 (5.4%)  1 (2.7%)  15 (41%) | 0 (0%)  0 (0%)  1 (2.7%)  2 (5.4%)  2 (5.4%)  0 (0%)  5 (14%) | 0 (0%)  0 (0%)  1 (2.7%)  0 (0%)  0 (0%)  0 (0%)  1 (2.7%) | 0.10 |
| c) Patients lack interest in treatment | 1  2  3  4  5  Missing  Total | 1 (2.7%)  2 (5.4%)  1 (2.7%)  7 (19%)  3 (8.1%)  0 (0%)  14 (38%) | 2 (5.4%)  2 (5.4%)  6 (16%)  4 (11%)  1 (2.7%)  1 (2.7%)  16 (43%) | 0 (0%)  0 (0%)  5 (14%)  1 (2.7%)  0 (0%)  0 (0%)  6 (16%) | 0 (0%)  0 (0%)  0 (0%)  1 (2.7%)  0 (0%)  0 (0%)  1 (2.7%) | 0.20 |
| d) Costs/coverage of medication for patients | 1  2  3  4  5  Missing  Total | 1 (2.7%)  1 (2.7%)  2 (5.4%)  4 (11%)  1 (2.7%)  0 (0%)  9 (24%) | 2 (5.4%)  2 (5.4%)  7 (19%)  5 (14%)  3 (8.1%)  1 (2.7%)  20 (54%) | 1 (2.7%)  0 (0%)  0 (0%)  4 (11%)  2 (5.4%)  0 (0%)  7 (19%) | 0 (0%)  0 (0%)  0 (0%)  1 (2.7%)  0 (0%)  0 (0%)  1 (2.7%) | 0.80 |
| e) Patients already see specialists for these medications | 1  2  3  4  5  Missing  Total | 2 (5.4%)  1 (2.7%)  1 (2.7%)  5 (14%)  0 (0%)  1 (2.7%)  10 (27%) | 1 (2.7%)  5 (14%)  10 (27%)  3 (8.1%)  3 (8.1%)  0 (0%)  22 (59%) | 0 (0%)  0 (0%)  3 (8.1%)  1 (2.7%)  0 (0%)  0 (0%)  4 (11%) | 0 (0%)  0 (0%)  0 (0%)  1 (2.7%)  0 (0%)  0 (0%)  1 (2.7%) | .089 |
| f) Inappropriate patient behaviors present safety issues | 1  2  3  4  5  Missing  Total | 0 (0%)  0 (0%)  5 (14%)  8 (22%)  4 (11%)  1 (2.7%)  18 (49%) | 2 (5.4%)  0 (0%)  6 (16%)  1 (2.7%)  4 (11%)  0 (0%)  13 (35%) | 0 (0%)  0 (0%)  0 (0%)  2 (5.4%)  3 (8.1%)  0 (0%)  5 (14%) | 0 (0%)  0 (0%)  1 (2.7%)  0 (0%)  0 (0%)  0 (0%)  1 (2.7%) | .094 |
| **Personal or Professional Barriers** | | | | | | |
| a) Professional licensing board oversight | 1  2  3  4  5  Missing  Total | 0 (0%)  2 (5.4%)  0 (0%)  5 (14%)  7 (19%)  1 (2.7%)  15 (41%) | 3 (8.1%)  1 (2.7%)  3 (8.1%)  6 (16%)  6 (16%)  0 (0%)  19 (51%) | 0 (0%)  0 (0%)  0 (0%)  0 (0%)  2 (5.4%)  0 (0%)  2 (5.4%) | 0 (0%)  0 (0%)  0 (0%)  1 (2.7%)  0 (0%)  0 (0%)  1 (2.7%) | 0.50 |
| b) Negative attitudes /perceptions of staff, other practitioners in my practice | 1  2  3  4  5  Missing  Total | 0 (0%)  1 (2.7%)  1 (2.7%)  4 (11%)  6 (16%)  1 (2.7%)  13 (35%) | 8 (22%)  2 (5.4%)  5 (14%)  4 (11%)  2 (5.4%)  0 (0%)  21 (57%) | 0 (0%)  0 (0%)  2 (5.4%)  0 (0%)  0 (0%)  0 (0%)  2 (5.4%) | 0 (0%)  0 (0%)  1 (2.7%)  0 (0%)  0 (0%)  0 (0%)  1 (2.7%) | **.009** |
| c) Negative attitudes /perceptions of other patients in my practice | 1  2  3  4  5  Missing  Total | 0 (0%)  0 (0%)  2 (5.4%)  6 (16%)  4 (11%)  1 (2.7%)  13 (35%) | 5 (14%)  4 (11%)  6 (16%)  3 (8.1%)  4 (11%)  0 (0%)  22 (59%) | 0 (0%)  0 (0%)  0 (0%)  1 (2.7%)  0 (0%)  0 (0%)  1 (2.7%) | 0 (0%)  1 (2.7%)  0 (0%)  0 (0%)  0 (0%)  0 (0%)  1 (2.7%) | **.041** |
| d) Negative impact on my reputation | 1  2  3  4  5  Missing  Total | 0 (0%)  3 (8.1%)  2 (5.4%)  4 (11%)  4 (11%)  1 (2.7%)  14 (38%) | 6 (16%)  6 (16%)  4 (11%)  2 (5.4%)  3 (8.1%)  0 (0%)  21 (57%) | 0 (0%)  0 (0%)  1 (2.7%)  0 (0%)  0 (0%)  0 (0%)  1 (2.7%) | 0 (0%)  0 (0%)  1 (2.7%)  0 (0%)  0 (0%)  0 (0%)  1 (2.7%) | 0.13 |
| e) Work-load/paperwork for insurance prior authorization requirements | 1  2  3  4  5  Missing  Total | 0 (0%)  0 (0%)  2 (5.4%)  6 (16%)  3 (8.1%)  0 (0%)  11 (30%) | 3 (8.1%)  1 (2.7%)  10 (27%)  4 (11%)  3 (8.1%)  1 (2.7%)  22 (59%) | 0 (0%)  1 (2.7%)  1 (2.7%)  1 (2.7%)  0 (0%)  0 (0%)  3 (8.1%) | 0 (0%)  0 (0%)  0 (0%)  1 (2.7%)  0 (0%)  0 (0%)  1 (2.7%) | 0.30 |
| f) Learning curve to take on new procedures | 1  2  3  4  5  Missing  Total | 0 (0%)  2 (5.4%)  0 (0%)  8 (22%)  7 (19%)  1 (2.7%)  18 (49%) | 2 (5.4%)  1 (2.7%)  5 (14%)  5 (14%)  2 (5.4%)  0 (0%)  15 (41%) | 0 (0%)  0 (0%)  0 (0%)  3 (8.1%)  0 (0%)  0 (0%)  3 (8.1%) | 0 (0%)  0 (0%)  0 (0%)  1 (2.7%)  0 (0%)  0 (0%)  1 (2.7%) | .088 |
| g) Low or no need for this service in my practice | 1  2  3  4  5  Missing  Total | 2 (5.4%)  0 (0%)  1 (2.7%)  3 (8.1%)  2 (5.4%)  0 (0%)  8 (22%) | 8 (22%)  2 (5.4%)  7 (19%)  1 (2.7%)  1 (2.7%)  1 (2.7%)  20 (54%) | 1 (2.7%)  2 (5.4%)  2 (5.4%)  3 (8.1%)  0 (0%)  0 (0%)  8 (22%) | 0 (0%)  1 (2.7%)  0 (0%)  0 (0%)  0 (0%)  0 (0%)  1 (2.7%) | 0.10 |
| h) Unfavorable change in patient population mix | 1  2  3  4  5  Missing  Total | 0 (0%)  0 (0%)  3 (8.1%)  4 (11%)  4 (11%)  1 (2.7%)  12 (32%) | 6 (16%)  4 (11%)  5 (14%)  5 (14%)  2 (5.4%)  0 (0%)  22 (59%) | 0 (0%)  0 (0%)  1 (2.7%)  1 (2.7%)  0 (0%)  0 (0%)  2 (5.4%) | 0 (0%)  1 (2.7%)  0 (0%)  0 (0%)  0 (0%)  0 (0%)  1 (2.7%) | 0.10 |
| i) Little management/ administrative support for buprenorphine service line | 1  2  3  4  5  Missing  Total | 0 (0%)  1 (2.7%)  0 (0%)  3 (8.1%)  5 (14%)  1 (2.7%)  10 (27%) | 5 (14%)  0 (0%)  6 (16%)  3 (8.1%)  4 (11%)  0 (0%)  18 (49%) | 0 (0%)  0 (0%)  1 (2.7%)  7 (19%)  0 (0%)  0 (0%)  8 (22%) | 0 (0%)  0 (0%)  0 (0%)  1 (2.7%)  0 (0%)  0 (0%)  1 (2.7%) | **.002** |
| j) Limited reimbursement rate of buprenorphine therapy/return on investment | 1  2  3  4  5  Missing  Total | 0 (0%)  1 (2.7%)  3 (8.1%)  2 (5.4%)  4 (11%)  0 (0%)  10 (27%) | 8 (22%)  6 (16%)  2 (5.4%)  3 (8.1%)  2 (5.4%)  1 (2.7%)  22 (59%) | 0 (0%)  0 (0%)  2 (5.4%)  2 (5.4%)  0 (0%)  0 (0%)  4 (11%) | 0 (0%)  0 (0%)  0 (0%)  1 (2.7%)  0 (0%)  0 (0%)  1 (2.7%) | **.024** |
| k) Lack of fit to my sense of who I am as a doctor, my calling | 1  2  3  4  5  Missing  Total | 0 (0%)  2 (5.4%)  4 (11%)  2 (5.4%)  2 (5.4%)  0 (0%)  10 (27%) | 11 (30%)  1 (2.7%)  5 (14%)  1 (2.7%)  2 (5.4%)  1 (2.7%)  21 (57%) | 0 (0%)  0 (0%)  4 (11%)  1 (2.7%)  0 (0%)  0 (0%)  5 (14%) | 0 (0%)  1 (2.7%)  0 (0%)  0 (0%)  0 (0%)  0 (0%)  1 (2.7%) | **.008** |
| l) Limited time in clinic setting for these appointments | 1  2  3  4  5  Missing  Total | 0 (0%)  2 (5.4%)  3 (8.1%)  3 (8.1%)  4 (11%)  1 (2.7%)  13 (35%) | 6 (16%)  0 (0%)  6 (16%)  2 (5.4%)  1 (2.7%)  0 (0%)  15 (41%) | 0 (0%)  0 (0%)  1 (2.7%)  3 (8.1%)  4 (11%)  0 (0%)  8 (22%) | 0 (0%)  0 (0%)  0 (0%)  1 (2.7%)  0 (0%)  0 (0%)  1 (2.7%) | **.016** |
| m) Insufficient supportive psychotherapy services in the community | 1  2  3  4  5  Missing  Total | 0 (0%)  0 (0%)  2 (5.4%)  4 (11%)  4 (11%)  0 (0%)  10 (27%) | 3 (8.1%)  0 (0%)  3 (8.1%)  4 (11%)  9 (24%)  1 (2.7%)  20 (54%) | 0 (0%)  0 (0%)  1 (2.7%)  4 (11%)  1 (2.7%)  0 (0%)  6 (16%) | 0 (0%)  0 (0%)  0 (0%)  1 (2.7%)  0 (0%)  0 (0%)  1 (2.7%) | 0.60 |

Note: Respondents were asked, “How important do you feel each of the following is as a potential barrier to your use of buprenorphine, specifically, as a medication for opioid use disorder (MOUD) in your clinic?”

*One respondent supplied pre-video retrospective ratings but no Post-video rating to indicate change (see “Missing”; N= 36 for change columns). Bold = p<0.05.

†1 =“not important” to 5=“important”.

**AT2. Change Ratings for Confidence and Likelihood of Offering Opioid Use Disorder Treatment: Post / Retrospective-Pre (N=37*)**

|  | Pre-Video Rating† | Post-Video Change (Frequency): | | | | | |
| --- | --- | --- | --- | --- | --- | --- | --- |
| ‡ | No Change | Very Confident/Highly Likely | No Rating | p-value |
| **How confident are you in each of the following aspects of your patient care?** | | | | | | | |
| a) Identifying patients at risk for misuse of pain medication | 1  2  3  4  5  Missing  Total |  | 0 (0%)  1 (2.7%)  2 (5.4%)  4 (11%)  2 (5.4%)  0 (0%)  9 (24%) | 0 (0%)  1 (2.7%)  11 (30%)  9 (24%)  5 (14%)  1 (2.7%)  27 (73%) | 0 (0%)  0 (0%)  0 (0%)  1 (2.7%)  0 (0%)  0 (0%)  1 (2.7%) | 0.80 |
| b) Managing patients in your practice who receive buprenorphine from other treatment providers | 1  2  3  4  5  Missing  Total |  | 0 (0%)  0 (0%)  2 (5.4%)  2 (5.4%)  4 (11%)  1 (2.7%)  9 (24%) | 2 (5.4%)  1 (2.7%)  13 (35%)  7 (19%)  4 (11%)  0 (0%)  27 (73%) | 0 (0%)  0 (0%)  0 (0%)  1 (2.7%)  0 (0%)  0 (0%)  1 (2.7%) | 0.20 |
| c) Managing buprenorphine prescribing in my practice | 1  2  3  4  5  Missing  Total |  | 0 (0%)  0 (0%)  6 (16%)  0 (0%)  3 (8.1%)  0 (0%)  9 (24%) | 4 (11%)  3 (8.1%)  8 (22%)  7 (19%)  4 (11%)  1 (2.7%)  27 (73%) | 0 (0%)  0 (0%)  0 (0%)  1 (2.7%)  0 (0%)  0 (0%)  1 (2.7%) | 0.20 |
|  | | | | | | | |
| **How likely are you to engage in the following?** | | | | | | | |
| a) Screen patients for Opioid Use Disorder within my practice | 1  2  3  4  5  Missing  Total |  | 0 (0%)  0 (0%)  1 (2.7%)  2 (5.4%)  5 (14%)  1 (2.7%)  9 (24%) | 0 (0%)  3 (8.1%)  12 (32%)  6 (16%)  5 (14%)  0 (0%)  26 (70%) | 0 (0%)  0 (0%)  0 (0%)  2 (5.4%)  0 (0%)  0 (0%)  2 (5.4%) | **0.04** |
| b) Screen for patients already receiving buprenorphine within my practice | 1  2  3  4  5  Missing  Total |  | 0 (0%)  0 (0%)  4 (11%)  3 (8.1%)  7 (19%)  1 (2.7%)  15 (41%) | 2 (5.4%)  1 (2.7%)  9 (24%)  6 (16%)  3 (8.1%)  0 (0%)  21 (57%) | 0 (0%)  0 (0%)  0 (0%)  1 (2.7%)  0 (0%)  0 (0%)  1 (2.7%) | 0.20 |
| c) Manage buprenorphine prescribing in my practice | 1  2  3  4  5  Missing  Total |  | 0 (0%)  0 (0%)  3 (8.1%)  1 (2.7%)  3 (8.1%)  1 (2.7%)  8 (22%) | 3 (8.1%)  1 (2.7%)  10 (27%)  9 (24%)  5 (14%)  0 (0%)  28 (76%) | 0 (0%)  0 (0%)  0 (0%)  1 (2.7%)  0 (0%)  0 (0%)  1 (2.7%) | 0.40 |
| d) Prescribe buprenorphine | 1  2  3  4  5  Missing  Total |  | 0 (0%)  1 (2.7%)  3 (8.1%)  1 (2.7%)  5 (14%)  1 (2.7%)  11 (30%) | 2 (5.4%)  6 (16%)  6 (16%)  5 (14%)  6 (16%)  0 (0%)  25 (68%) | 0 (0%)  0 (0%)  1 (2.7%)  0 (0%)  0 (0%)  0 (0%)  1 (2.7%) | 0.50 |
| e) Consider board certification as an Addiction Medicine Specialist | 1  2  3  4  5  Missing  Total |  | 7 (19%)  4 (11%)  5 (14%)  0 (0%)  3 (8.1%)  1 (2.7%)  20 (54%) | 1 (2.7%)  1 (2.7%)  6 (16%)  2 (5.4%)  6 (16%)  0 (0%)  16 (43%) | 1 (2.7%)  0 (0%)  0 (0%)  0 (0%)  0 (0%)  0 (0%)  1 (2.7%) | 0.07 |

*One respondent supplied pre-video retrospective ratings but no Post-video rating to indicate change (see “Missing”; N= 36 for change columns). Bold = p<0.05.

†1 =“not confident” / “highly unlikely” to 5= “”highly confident” / “highly likely”.

‡No respondents had changes in the direction of “Not Confident” / “Highly Unlikely”
